# Supplementary material for: Complex interactions between p.His558Arg and linked variants in the sodium voltage-gated channel alpha subunit 5 (NaV1.5)
Source: PeerJ journal article supplement (doi:10.7717/peerj.13913), 2022-08-17
Supplement: Supplementary_material_revised.pdf [file Supplementary_material_revised.pdf]

# Complex interactions between p.His558Arg and linked variants in the Sodium Voltage-Gated Channel Alpha Subunit 5 (Na<sub>v</sub>1.5)

**Mónica Lopes-Marques<sup>1,2,3\*</sup>; Raquel M. Silva<sup>4</sup>, Catarina Serrano<sup>1,2,3</sup>, Verónica Gomes<sup>1,2</sup>, Ana Rita Cardoso<sup>1,2,3</sup>, Maria J. Prata<sup>1,2,3</sup>, António Amorim<sup>1,2,3</sup>, Luísa Azevedo<sup>1,2,3\*</sup>**

<sup>1</sup> i3S- Instituto de Investigação e Inovação em Saúde, Universidade do Porto, Population Genetics and Evolution Group, Rua Alfredo Allen 208, 4200-135 Porto, Portugal

<sup>2</sup> IPATIMUP-Institute of Molecular Pathology and Immunology, University of Porto, Rua Júlio Amaral de Carvalho 45, 4200-135 Porto, Portugal

<sup>3</sup> Department of Biology, Faculty of Sciences of the University of Porto, Rua do Campo Alegre, s/n, 4169-007 Porto, Portugal

<sup>4</sup> Universidade Católica Portuguesa, Faculdade de Medicina Dentária, Center for Interdisciplinary Research in Health (CIIS), Estrada da Circunvalação, 3504-505 Viseu, Portugal

---

**Table S1.** Summary of the collected data from 14 studies regarding the functional impact in patch clamp assays of p.His558Arg. Exp: expression system used in the functional characterization, cis- both deleterious and polymorphic variants are localized in the same construct, trans- deleterious variant and polymorphism are localized in distinct constructs and co-expressed, \* Not deleterious variants - A572D, is considered a polymorphism and is found in the general population; also Q1077 and Q1077del corresponds to alternative splice isoform of *SCN5A*. ● AC1377587 sequence associated to this accession number is not available in NCBI. Wt-wild-type.

| H558R | Mutation             | Exp.         | Background   | Observations                                                                                                                          | Outcome                                         | Ref            |
|-------|----------------------|--------------|--------------|---------------------------------------------------------------------------------------------------------------------------------------|-------------------------------------------------|----------------|
| H     | E161K<br>rs199473062 | <i>cis</i>   | M77235       | Loss of function (incomplete penetrance)                                                                                              |                                                 | PMID: 20384651 |
| R     | E161K                | <i>cis</i>   | M77235       | Steady state inactivation shifted towards hyperpolarizing potentials                                                                  | Aggravate                                       |                |
| H     | S216L<br>rs41276525  | <i>cis</i>   | M77235 (hH1) | Decrease in $I_{Na}$ and misfolding and reduced membrane localization                                                                 | -                                               | PMID: 21705349 |
| R     | S216L                | <i>cis</i>   | M77235 (hH1) | Recovery of $I_{Na}$ , delayed inactivation recovery                                                                                  | Ameliorate                                      |                |
| H     | R222Q+Q1007del       | <i>cis</i>   | AY148488     | $I_{Na}$ density normal, alterations in the activation and inactivation negative shift                                                | -                                               | PMID: 21167004 |
| R     | R222Q+Q1007del       | <i>cis</i>   | AY148488     | 35% reduction in $I_{Na}$ density, alterations in the activation and inactivation negative shift, slower recovery from inactivation   | Aggravate in the Q1077 del                      |                |
| H     | R222Q<br>282h        | <i>cis</i>   | AC1377587*   | $I_{Na}$ density normal, alterations in the activation and inactivation negative shift                                                | -                                               |                |
| R     | R222Q                | <i>cis</i>   | AC1377587*   | $I_{Na}$ density normal, alterations in the activation and inactivation negative shift                                                | -                                               |                |
| H     | R282H                | <i>trans</i> | NM 198056    | Reduced ~58% whole cell currents                                                                                                      | -                                               | PMID: 16864729 |
| H     | Wt                   |              | NM 198056    |                                                                                                                                       |                                                 |                |
| H     | R282H                | <i>trans</i> | NM 198056    | Normal current                                                                                                                        | Full rescue through trafficking                 |                |
| R     | Wt                   |              | NM 198056    |                                                                                                                                       |                                                 |                |
| R     | R282H                | <i>trans</i> | NM 198056    | Reduced ~48% whole cell currents                                                                                                      | -                                               |                |
| H     | Wt                   |              | NM 198056    |                                                                                                                                       |                                                 |                |
| H     | Wt                   | <i>trans</i> | NM 198056    | Normal current                                                                                                                        | Normal                                          |                |
| R     | Wt                   |              | NM 198056    |                                                                                                                                       |                                                 |                |
| H     | R282H                | <i>cis</i>   | NM 198056    | No current                                                                                                                            | -                                               |                |
| R     | R282H                | <i>cis</i>   | NM 198056    | No current                                                                                                                            | -                                               |                |
| H     | G400A                |              | hH1a         | Reduced peak current                                                                                                                  |                                                 | PMID: 17675083 |
| R     | G400A                |              | hH1a         | Further reduced peak current                                                                                                          | Aggravate                                       |                |
| H     | T512I                | <i>cis</i>   | M77235 (hH1) | Increased development of slow inactivation                                                                                            | -                                               | PMID: 12569159 |
| R     | T512I                | <i>cis</i>   | M77235 (hH1) | Enhanced slow activation                                                                                                              | Ameliorate                                      |                |
| H     | *A572 +<br>Q1077del  |              | hH1C         | normal                                                                                                                                |                                                 | PMID: 20403459 |
| R     | *A572+<br>Q1077del   |              |              | normal                                                                                                                                |                                                 |                |
| H     | *A572D+<br>Q1077del  |              | 17           | Peak current equal to Wt                                                                                                              |                                                 |                |
| R     | *A572D+<br>Q1077del  |              |              | Not significant lower peak current, increase in late persistent current, significant negative shift in the steady states inactivation | Aggravate<br>Double hit mutation linked to R558 |                |
| H     | *Q1077               |              | AC1377587●   | Reduced current (not significant)                                                                                                     | Normal                                          |                |
| R     | *Q1077               |              | AC1377587●   | Little or No $I_{Na}$ density??                                                                                                       | Aggravate                                       |                |
| H     | *Q1077del            |              | AY148488     | Normal currents                                                                                                                       | Normal                                          |                |
| R     | *Q1077del            |              | AY148488     | Normal currents                                                                                                                       | Normal                                          |                |
| R     | *Q1077               | <i>trans</i> | AC1377587●   | Normal currents                                                                                                                       | Normal                                          |                |
| R     | *                    |              | AY148488     |                                                                                                                                       |                                                 |                |
| H     | D1275N               | <i>cis</i>   | M77235 (hH1) | Reduced peak current                                                                                                                  |                                                 | PMID: 20384651 |
| R     | D1275N               | <i>cis</i>   | M77235 (hH1) | 2 fold peak increase in peak current comparable to Wt, Hyperpolarizing potential, negative shifts of the midinactivation              | Ameliorate<br>Through intracellular trafficking |                |
| H     | D1632H               | <i>cis</i>   | M77235 (hH1) | Loss of function                                                                                                                      |                                                 |                |
| R     | D1632H               | <i>cis</i>   | M77235 (hH1) | Hyperpolarizing potential, negative shifts of the mid inactivation                                                                    | Aggravate                                       |                |

| H558R | Mutation        | Exp.         | Background   | Observations                                                                                                                                 | Outcome                    | Ref            |
|-------|-----------------|--------------|--------------|----------------------------------------------------------------------------------------------------------------------------------------------|----------------------------|----------------|
| H     | P1298L          | <i>cis</i>   |              |                                                                                                                                              |                            | PMID: 20384651 |
| R     | P1298L          | <i>cis</i>   |              | Hyperpolarizing potential, negative shifts of the mid inactivation                                                                           | Aggravate                  |                |
| H     | -               | <i>cis</i>   | M77235 (hH1) | Normal peak currents                                                                                                                         |                            | PMID: 23085483 |
| H     | D1690N          | <i>cis</i>   | M77235 (hH1) | Reduced peak currents, defective trafficking to the membrane                                                                                 |                            |                |
| H     | G1748D          | <i>cis</i>   | M77235 (hH1) | Very low peak currents, defective trafficking to the membrane                                                                                |                            |                |
| H     | -               | <i>trans</i> | M77235 (hH1) | 30% reduced peak current                                                                                                                     |                            |                |
| H     | D1690N          |              | M77235 (hH1) |                                                                                                                                              |                            |                |
| H     | -               | <i>trans</i> | M77235 (hH1) | 15% reduced peak current                                                                                                                     |                            |                |
| H     | G1748D          |              | M77235 (hH1) |                                                                                                                                              |                            |                |
| R     | -               | <i>trans</i> | M77235 (hH1) | Reduced Current                                                                                                                              |                            |                |
| H     | D1690N          |              | M77235 (hH1) |                                                                                                                                              |                            |                |
| R     | -               | <i>trans</i> | M77235 (hH1) | Reduced current                                                                                                                              |                            |                |
| H     | G1748D          |              | M77235 (hH1) |                                                                                                                                              |                            |                |
| R     | D1690N          | <i>cis</i>   | M77235 (hH1) | Restoration of Wt currents, correct trafficking to the membrane                                                                              | Ameliorate                 |                |
| R     | G1748D          | <i>cis</i>   | M77235 (hH1) | Very low peak currents                                                                                                                       |                            |                |
| R     | M1766L          |              | hH1b         | Normal currents and cell trafficking                                                                                                         | Ameliorate                 | PMID: 12454206 |
| H     | M1766L          | <i>cis</i>   | M77235 (hH1) | Reduced currents                                                                                                                             |                            |                |
| H     | M1766L          | <i>cis</i>   | hH1a         | Reduced currents                                                                                                                             |                            |                |
| R     | M1766L          | <i>cis</i>   | hH1a         | Normal currents and cell trafficking restores                                                                                                | ameliorate                 |                |
| H     | E1784K          | <i>trans</i> | hH1c         | Reduced currents                                                                                                                             |                            | PMID: 27381756 |
| H     | -               |              | hH1c         |                                                                                                                                              |                            |                |
| H     | E1784K          | <i>trans</i> | hH1c         | More prominent reduced currents                                                                                                              | Aggravate                  |                |
| R     | -               |              | hH1c         |                                                                                                                                              |                            |                |
| H     | I1835T          |              | AC1377587●   | I <sub>Na</sub> density normal, late I <sub>Na</sub> normal                                                                                  | Normal                     | PMID: 21167004 |
| R     | I1835T          |              | AC1377587●   | I <sub>Na</sub> density normal, late I <sub>Na</sub> normal, negative shift in inactivation, normal recovery from inactivation               | Aggravate                  |                |
| H     | I1835T+Q1007del |              | AY148488     | No significant differences                                                                                                                   | Normal                     | PMID: 21109022 |
| R     | I1835T+Q1007del |              | AY148488     | 30% reduction in the I <sub>Na</sub> density, negative shift in inactivation, slower recovery from inactivation                              | Aggravate ++ in a Q1007del |                |
| H     | P2006A          |              | NM 198056    | Increased persistent sodium currents, and +10mV shift in voltage dependence of steady state in activation, faster recovery from inactivation |                            | PMID: 21109022 |
| R     | P2006A          |              | NM 198056    | Sodium currents recovered values comparable with Wt                                                                                          | Ameliorate                 |                |
| H     | P2006A          | <i>trans</i> | NM 198056    | Sodium currents recovered values comparable with Wt                                                                                          | Ameliorate                 |                |
| R     | P2006A          |              | NM 198056    | Sodium currents recovered values comparable with Wt                                                                                          | Ameliorate                 |                |
| R     | -               | <i>trans</i> | NM 198056    | Sodium currents recovered values comparable with Wt                                                                                          | Ameliorate                 |                |
| R     | P2006A          |              | NM 198056    | Sodium currents recovered values comparable with Wt                                                                                          | Ameliorate                 |                |
| H     | -               | <i>trans</i> | NM 198056    | +9mV shift in steady state inactivation                                                                                                      | -                          | PMID: 21109022 |
| R     | V1951L          |              | NM 198056    | Recovery to Wt values                                                                                                                        | Ameliorate                 |                |

**Table S2.** Accession numbers of *SCN5A* sequences for species with no annotated *SCN5A*. Gene manual annotation was performed and scaffold numbers where *SCN5A* was identified are provided. In the case of species with no *SCN5A* annotation and no genome assembly, SRA projects were searched and project numbers are indicated in Table S3.

|    |      | Species                                | Order                                 | Accession number <i>SCN5A</i><br>Neonatal | Allele |
|----|------|----------------------------------------|---------------------------------------|-------------------------------------------|--------|
| 1  | HSA  | <i>Homo sapiens</i>                    | Primate-Hominoidae                    | NM_198056.2                               | H/R    |
| 2  | PPA  | <i>Pan paniscus</i>                    | Primate-Hominoidae                    | XM_008951545.1                            | R      |
| 3  | PTR  | <i>Pan troglodytes</i>                 | Primate-Hominoidae                    | XM_016940745.2                            | R      |
| 4  | GBE  | <i>Gorilla beringei</i>                | Primate-Hominoidae                    | SRA                                       | R      |
| 5  | GGO  | <i>Gorilla gorilla</i>                 | Primate-Hominoidae                    | XM_019024737.2                            | R      |
| 6  | PAB  | <i>Pongo abelii</i>                    | Primate-Hominoidae                    | XM_024245225.1                            | H/Q    |
| 7  | PPY  | <i>Pongo pygmaeus</i>                  | Primate-Hominoidae                    | SRA                                       | H/Q    |
| 8  | HMO  | <i>Hylobates moloch</i>                | Primate-Hominoidae                    | XM_032162037.1                            | R      |
| 9  | NLE  | <i>Nomascus leucogenys</i>             | Primate-Hominoidae                    | XM_030812100.1                            | R      |
| 10 | RBI  | <i>Rhinopithecus bieti</i>             | Primate- Haplorrhini-Cercopithecoidea | XM_017849653.1                            | H      |
| 11 | RRO  | <i>Rhinopithecus roxellana</i>         | Primate- Haplorrhini-Cercopithecoidea | XM_010371496.2                            | H      |
| 12 | NLA  | <i>Nasalis larvatus</i>                | Primate- Haplorrhini-Cercopithecoidea | SRA                                       | H      |
| 13 | SEM  | <i>Semnopithecus entellus</i>          | Primate- Haplorrhini-Cercopithecoidea | SRA                                       | H      |
| 14 | TFR  | <i>Trachypithecus francoisi</i>        | Primate- Haplorrhini-Cercopithecoidea | XM_033212073.1                            | H      |
| 15 | PTE  | <i>Ptilocolobus tephrosceles</i>       | Primate-Haplorrhini-Cercopithecoidea  | XM_023231462.1                            | H      |
| 16 | CAN  | <i>Colobus angolensis</i>              | Primate- Haplorrhini-Cercopithecoidea | XM_011953304.1                            | H      |
| 17 | PAN  | <i>Papio anubis</i>                    | Primate- Haplorrhini-Cercopithecoidea | XM_009201170.3                            | H      |
| 18 | TGE  | <i>Theropithecus gelada</i>            | Primate- Haplorrhini-Cercopithecoidea | XM_025375222.1                            | H      |
| 19 | MLE  | <i>Mandrillus leucophaeus</i>          | Primate- Haplorrhini-Cercopithecoidea | XM_011999484.1                            | H      |
| 20 | MSP  | <i>Mandrillus sphinx</i>               | Primate- Haplorrhini-Cercopithecoidea | SRA                                       | H      |
| 21 | CAT  | <i>Cercocebus atys</i>                 | Primate- Haplorrhini-Cercopithecoidea | XM_012034251.1                            | H      |
| 22 | MFU  | <i>Macaca fuscata</i>                  | Primate- Haplorrhini-Cercopithecoidea | SRA                                       | H      |
| 23 | MMUL | <i>Macaca mulatta</i>                  | Primate- Haplorrhini-Cercopithecoidea | XM_015131334.1                            | H      |
| 24 | MNE  | <i>Macaca nemestrina</i>               | Primate- Haplorrhini-Cercopithecoidea | XM_011738773.2                            | H      |
| 25 | MFA  | <i>Macaca fascicularis</i>             | Primate- Haplorrhini-Cercopithecoidea | XM_005546683.2                            | H      |
| 26 | CSA  | <i>Chlorocebus sabaeus</i>             | Primate- Haplorrhini-Cercopithecoidea | XM_007971735.1                            | H      |
| 27 | SIM  | <i>Saguinus imperator</i>              | Primate- Haplorrhini-Platyrrhini      | SRA                                       | H      |
| 28 | CJA  | <i>Callithrix jacchus</i>              | Primate- Haplorrhini-Platyrrhini      | XM_017965958.1                            | H      |
| 29 | ANA  | <i>Aotus nancymae</i>                  | Primate- Haplorrhini-Platyrrhini      | XM_021666569.1                            | H      |
| 30 | SBO  | <i>Saimiri boliviensis boliviensis</i> | Primate- Haplorrhini-Platyrrhini      | XM_010341492.1                            | H      |
| 31 | CCA  | <i>Cebus capucinus imitator</i>        | Primate- Haplorrhini-Platyrrhini      | XM_017508376.1                            | H      |
| 32 | APA  | <i>Alouatta palliata</i>               | Primate- Haplorrhini-Platyrrhini      | PVKV010013273.1<br>PVKV010001690.1        | H      |
| 33 | AGE  | <i>Ateles geoffroyi</i>                | Primate- Haplorrhini-Platyrrhini      | PVHS01012057.1<br>PVHS01040726.1          | H      |
| 34 | PPI  | <i>Pithecia pithecia</i>               | Primate- Haplorrhini-Platyrrhini      | PVIP01001086.1                            | H      |
| 35 | CSY  | <i>Carlito syrichta</i>                | Primate- Haplorrhini- Tarsiidae       | XM_008053200.2                            | R      |
| 36 | OGA  | <i>Otolemur garnettii</i>              | Primate- Strepsirrhini- Lorisiformes  | XM_023515918.1                            | R      |
| 37 | MMUR | <i>Microcebus murinus</i>              | Primate- Strepsirrhini- Lemuriformes  | XM_012756399.1                            | R      |
| 38 | PCO  | <i>Propithecus coquereli</i>           | Primate- Strepsirrhini- Lemuriformes  | XM_012643255.1                            | R      |
| 39 | NGA  | <i>Nannospalax galili</i>              | Rodentia-Myomorpha                    | XM_008836179.1                            | R      |
| 40 | MMU  | <i>Mus musculus</i>                    | Rodentia-Myomorpha                    | NM_001253860.1                            | R      |
| 41 | RNO  | <i>Rattus norvegicus</i>               | Rodentia-Myomorpha                    | NM_013125.2                               | H/R    |
| 42 | CGR  | <i>Cricetulus griseus</i>              | Rodentia-Myomorpha                    | XM_035444055.1                            | R      |
| 43 | MOC  | <i>Microtus ochrogaster</i>            | Rodentia-Myomorpha                    | XM_005348090.3                            | R      |
| 44 | PMA  | <i>Peromyscus maniculatus</i>          | Rodentia-Myomorpha                    | XM_006986726.2                            | R      |
| 45 | MMA  | <i>Marmota marmota marmota</i>         | Rodentia-Sciuromorpha                 | XM_015489475.1                            | R      |
| 46 | ITR  | <i>Ictidomys tridecemlineatus</i>      | Rodentia-Sciuromorpha                 | XM_005317377.2                            | R      |
| 47 | CPO  | <i>Cavia porcellus</i>                 | Rodentia-Hystricomorpha               | XM_005001107.2                            | R      |
| 48 | HGL  | <i>Heterocephalus glaber</i>           | Rodentia-Hystricomorpha               | XM_004835238.2                            | R      |
| 49 | ODE  | <i>Octodon degus</i>                   | Rodentia-Hystricomorpha               | XM_004642153.2                            | R      |
| 50 | CLA  | <i>Chinchilla lanigera</i>             | Rodentia-Hystricomorpha               | XM_005386578.2                            | R      |
| 51 | OCU  | <i>Oryctolagus cuniculus</i>           | Lagomorpha                            | XM_017340134.1                            | R      |
| 52 | OPR  | <i>Ochotona princeps</i>               | Lagomorpha                            | XM_017340134.1                            | R      |
| 53 | SSC  | <i>Sus scrofa</i>                      | Cetartiodactyla- Suina                | XM_021071676.1                            | R      |
| 54 | CDR  | <i>Camelus dromedarius</i>             | Cetartiodactyla- Camelidae            | XM_010974813.1                            | R      |
| 55 | CFE  | <i>Camelus ferus</i>                   | Cetartiodactyla- Camelidae            | XM_032459195.1                            | R      |
| 56 | BTA  | <i>Bos taurus</i>                      | Cetartiodactyla- Ruminantia-Bovinae   | NM_174458.2                               | R      |
| 57 | BMU  | <i>Bos mutus</i>                       | Cetartiodactyla- Ruminantia-Bovinae   | XM_005901131.1                            | R      |
| 58 | OAR  | <i>Ovis aries</i>                      | Cetartiodactyla- Ruminantia-Caprinae  | XM_012140142.2                            | R      |
| 59 | CHI  | <i>Capra hircus</i>                    | Cetartiodactyla- Ruminantia-Caprinae  | XM_018038398.1                            | R      |

|    |      |                                    |                                    |                |   |
|----|------|------------------------------------|------------------------------------|----------------|---|
| 60 | OOR  | <i>Orcinus orca</i>                | Cetartiodactyla-Cetacea-Odontoceti | XM_004277836.1 | R |
| 61 | LVE  | <i>Lipotes vexillifer</i>          | Cetartiodactyla-Cetacea-Odontoceti | XM_007468130.1 | R |
| 62 | PCA  | <i>Physeter catodon</i>            | Cetartiodactyla-Cetacea-Mysticeti  | XM_007110496.2 | R |
| 63 | BAC  | <i>Balaenoptera acutorostrata</i>  | Cetartiodactyla-Cetacea-Mysticeti  | XM_007191459.1 | R |
| 64 | CSI  | <i>Ceratotherium simum simum</i>   | Perissodactyla-Rhinocerotidae      | XM_014790663.1 | R |
| 65 | ECA  | <i>Equus caballus</i>              | Perissodactyla-Equidea             | XM_023619740.1 | R |
| 66 | ORO  | <i>Odobenus rosmarus divergens</i> | Carnivora -Caniformia              | XM_012566600.1 | R |
| 67 | CLU  | <i>Canis lupus familiaris</i>      | Carnivora -Caniformia              | NM_001002994.1 | R |
| 68 | MFU  | <i>Mustela putorius furo</i>       | Carnivora -Caniformia              | XM_004759336.2 | R |
| 69 | AME  | <i>Ailuropoda melanoleuca</i>      | Carnivora -Caniformia              | XM_034662224.1 | H |
| 70 | UMA  | <i>Ursus maritimus</i>             | Carnivora -Caniformia              | XM_008710149.1 | R |
| 71 | AJU  | <i>Acinonyx jubatus</i>            | Carnivora -Feliformia              | XM_027040708.1 | R |
| 72 | PPAR | <i>Panthera pardus</i>             | Carnivora -Feliformia              | XM_019418729.1 | R |
| 73 | FCA  | <i>Felis catus</i>                 | Carnivora -Feliformia              | XM_023260721.1 | R |
| 74 | DRO  | <i>Desmodus rotundus</i>           | Chiroptera                         | XM_024565669.1 | R |
| 75 | HAR  | <i>Hipposideros armiger</i>        | Chiroptera                         | XM_019662785.1 | R |
| 76 | MNA  | <i>Miniopterus natalensis</i>      | Chiroptera                         | XM_016196168.1 | R |
| 77 | TCH  | <i>Tupaia chinensis</i>            | Scandentia                         | XM_006161350.2 | R |
| 78 | GVA  | <i>Galeopterus variegatus</i>      | Dermoptera                         | XM_008567166.1 | R |
| 79 | LAF  | <i>Loxodonta africana</i>          | Afrotheria- Proboscidea            | XM_023554825.1 | R |
| 80 | CAS  | <i>Chrysochloris asiatica</i>      | Afrotheria-Afrosoricida            | XM_006869133.1 | R |
| 81 | OAF  | <i>Orycteropus afer afer</i>       | Afrotheria-Tubulidentata           | XM_007945712.1 | R |
| 82 | CCR  | <i>Condylura cristata</i>          | Insectivora-Talpidae               | XM_004676302.2 | R |
| 83 | EEU  | <i>Erinaceus europaeus</i>         | Insectivora- Erinaceomorpha        | XM_007517226.2 | R |
| 84 | MDO  | <i>Monodelphis domestica</i>       | Marsupialia                        | NM_001246327.1 | R |

**Table S3.** SRA projects searched to determine the polymorphic status at position 558 of the *SCN5A* gene in other primate species. \* indicates that project was searched and no hit overlapping the H558R region was retrieved.

| Species                               | Project     | SRX                            | Sample      | Origin                                  | Observations | Allele    |          |
|---------------------------------------|-------------|--------------------------------|-------------|-----------------------------------------|--------------|-----------|----------|
| <i>Pan troglodytes schweinfurthii</i> | PRJNA189439 | SRX237524                      | Bwanbale    | Wild Born                               | Eastern      | R         |          |
|                                       |             | SRX237527                      | Kidongo     | Wild Born                               | Eastern      | R         |          |
|                                       |             | SRX237541                      | Nakuu       | Wild Born                               | Eastern      | R         |          |
|                                       | PRJEB2482   | ERX012404                      | Cindy       | Chimpanzee Sanctuary                    |              | R         |          |
|                                       |             | ERX012403                      | Sally       | Chimpanzee Sanctuary                    |              | R         |          |
|                                       |             | ERX012402                      | Nakuu       | Chimpanzee Sanctuary                    |              | *         |          |
|                                       |             | ERX012398                      | Katie       | Chimpanzee Sanctuary                    |              | *         |          |
|                                       |             | ERX012395                      | Kidogo      | Chimpanzee Sanctuary                    |              | R         |          |
|                                       |             | ERX012394                      | Kazakuhire  | Chimpanzee Sanctuary                    |              | *         |          |
|                                       |             | ERX012393                      | Becky       | Chimpanzee Sanctuary                    |              | R         |          |
| <i>Pan troglodytes troglodytes</i>    | PRJNA189439 | SRX243446                      | Donald      | Captive Born                            | Hybrid       | R         |          |
|                                       |             | SRX243487                      | Jimmie      | Wild Born                               | Western      | R         |          |
|                                       |             | SRX243489                      | Vaillant    | Wild Born                               | Central      | R         |          |
|                                       |             | SRX243491                      | Doris       | Wild Born                               | Central      | *         |          |
|                                       |             | SRX243493                      | Julie       | Wild Born                               | Central      | R         |          |
|                                       |             | SRX243499                      | Koby        | Wild Born                               | Western      | R         |          |
|                                       |             | SRX243495                      | Clara       | Wild Born                               | Central      | R         |          |
|                                       |             | SRX243448                      |             |                                         |              |           |          |
|                                       |             | SRX243449                      | Bosco       | Wild Born                               | Western      | R         |          |
|                                       | PRJEB2482   | ERX012401                      | Marcelle    | Tchimpounga Chimp rehabilitation center |              | R         |          |
|                                       |             | ERX012397                      | Bayokele    | Tchimpounga Chimp rehabilitation center |              | R         |          |
|                                       |             | ERX012392                      | Golfi       | Tchimpounga Chimp rehabilitation center |              | *         |          |
|                                       |             | ERX012391                      | Gao         | Tchimpounga Chimp rehabilitation center |              | R         |          |
|                                       |             | ERX012390                      | FanTuek     | Tchimpounga Chimp rehabilitation center |              | R         |          |
|                                       |             | ERX012389                      | Botsomi     | Tchimpounga Chimp rehabilitation center |              | R         |          |
|                                       |             | ERX012388                      | Agnagui     | Tchimpounga Chimp rehabilitation center |              | R         |          |
|                                       |             | <i>Pan troglodytes ellioti</i> | PRJNA189439 | SRX360475                               | Akwaya-Jean  | Wild Born | Nigerian |
| SRX360476                             | Damian      |                                |             | Wild Born                               | Nigerian     | R         |          |
| SRX360477                             | Julie_LWC21 |                                |             | Wild Born                               | Nigerian     | R         |          |
| SRX360478                             | Koto        |                                |             | Wild Born                               | Nigerian     | R         |          |
| SRX360479                             | Taweh       |                                |             | Wild Born                               | Nigerian     | R         |          |

Continues next page

| Species                        | Project     | SRX          | Sample         | Origin       | Observations | H558R |
|--------------------------------|-------------|--------------|----------------|--------------|--------------|-------|
| <i>Pan paniscus</i>            | PRJNA189439 | SRX242682    | Kumbuka        | Captive Born |              | R     |
|                                |             | SRX242681    |                |              |              |       |
|                                |             | SRX241545    | Salonga        | Captive Born |              | R     |
|                                |             | SRX241544    |                |              |              |       |
|                                |             | SRX241481    |                |              |              |       |
|                                |             | SRX241477    |                |              |              |       |
|                                |             | SRX241461    |                |              |              |       |
|                                |             | SRX241441    | Natalie        | Wild Born    |              | R     |
|                                |             | SRX241378    | Bono           | Wild Born    |              | R     |
|                                |             | SRX241367    |                |              |              |       |
|                                |             | SRX241358    |                |              |              |       |
|                                |             | SRX241352    |                |              |              |       |
|                                |             | SRX241312    | Chipita        | Wild Born    |              | R     |
|                                |             | SRX241311    |                |              |              |       |
|                                |             | SRX241308    | Kombate        | Wild Born    |              | R     |
|                                |             | SRX241307    |                |              |              |       |
|                                |             | SRX241305    |                |              |              |       |
|                                |             | SRX241304    | Catherine      | Wild Born    |              | R     |
|                                |             | SRX241303    |                |              |              |       |
|                                |             | SRX241302    | Desmond        | Wild Born    |              | R     |
|                                |             | SRX241295    |                |              |              |       |
|                                |             | SRX241294    |                |              |              |       |
|                                |             | SRX241293    | Hermien        | Wild Born    |              | *     |
|                                |             | SRX241292    |                |              |              |       |
|                                |             | SRX241291    | Dzeeta         | Wild Born    |              | R     |
|                                |             | SRX241290    |                |              |              |       |
|                                |             | SRX241289    | Kosana         | Wild Born    |              | R     |
|                                |             | SRX241288    |                |              |              |       |
| SRX237623                      | Hortense    | Wild Born    |                | R            |              |       |
| SRX243437                      | LB502       | Captive Born | Lymphoblastoid | R            |              |       |
| <i>Gorilla gorilla gorilla</i> | PRJNA189439 | SRX243504    | Akiba          | Wild Born    |              | R     |
|                                |             | SRX243505    | Choomba        | Wild Born    |              | R     |
|                                |             | SRX243506    | Paki           | Wild Born    |              | *     |
|                                |             | SRX243508    | Anthal         | Wild Born    |              | R     |
|                                |             | SRX243509    | Katie_B650     | Wild Born    |              | *     |
|                                |             | SRX243438    | Kowali         | Captive Born |              | R     |
|                                |             | SRX243440    | Bulera         | Captive Born |              | R     |
|                                |             | SRX243442    | Azizi          | Captive Born |              | R     |
|                                |             | SRX243444    | Suzie          | Wild Born    |              | R     |
|                                |             | SRX243455    | Banjo          | Wild Born    |              | R     |
|                                |             | SRX243457    | Mimi           | Wild Born    |              | R     |
|                                |             | SRX243461    | Delphi         | Wild Born    |              | R     |
|                                |             | SRX243466    | Kolo           | Captive Born |              | R     |
|                                |             | SRX243463    | Coco           | Wild Born    |              | R     |
|                                | PRJEB1976   |              | ERS000016      |              |              | R     |
|                                | PRJNA593056 | SRX7254244   | Kamilah        | Captive Born | Fibroblast   | R/H   |

Continues next page

| Species                         | Project     | SRX        | Sample       | Origin       | Observations            | H558R |
|---------------------------------|-------------|------------|--------------|--------------|-------------------------|-------|
| <i>Gorilla gorilla diehli</i>   | PRJNA189439 | SRX2343507 | Nyango       | Wild Born    |                         | R     |
| <i>Gorilla beringei graueri</i> | PRJNA189439 | SRX243529  | Victoria     | Captive Born | Eastern lowland gorilla | R     |
|                                 |             | SRX243528  |              |              |                         |       |
|                                 |             | SRX243532  |              |              |                         |       |
|                                 |             | SRX243531  |              |              |                         |       |
|                                 |             | SRX243530  | Kaisi        | Wild born    | Eastern lowland gorilla | R     |
|                                 |             | SRX242688  |              |              |                         |       |
|                                 |             | SRX242687  |              |              |                         |       |
|                                 |             | SRX242686  | Mkubwa       | Wild born    | Eastern lowland gorilla | R     |
|                                 |             | SRX242685  |              |              |                         |       |
| SRX243453                       |             |            |              |              |                         |       |
| <i>Pongo pygmaeus</i>           | PRJNA189439 | SRX243476  | Napoleon     | Wild Born    | Bornean orangutan       | H     |
|                                 |             | SRX243475  |              |              |                         |       |
|                                 |             | SRX243474  | Tilda        | Wild Born    | Bornean orangutan       | H/Q   |
|                                 |             | SRX243473  |              |              |                         |       |
|                                 |             | SRX243472  | Sari         | Captive Born | Bornean orangutan       | H     |
|                                 |             | SRX243471  |              |              |                         |       |
|                                 |             | SRX243470  | Temmy        | Captive Born | Bornean orangutan       | H     |
|                                 |             | SRX243469  |              |              |                         |       |
|                                 |             | SRX243468  | Nonja        | Captive Born | Bornean orangutan       | H/Q   |
| SRX243467                       |             |            |              |              |                         |       |
| <i>Pongo abelii</i>             |             | SRX243486  | Buschi       | Wild born    | Sumatran orangutan      | H     |
|                                 |             | SRX243485  |              |              |                         |       |
|                                 |             | SRX243484  | Babu         | Wild born    | Sumatran orangutan      | H     |
|                                 |             | SRX243483  |              |              |                         |       |
|                                 |             | SRX243482  | Dunja        | Captive Born | Sumatran orangutan      | H/Q   |
|                                 |             | SRX243481  |              |              |                         |       |
|                                 |             | SRX243480  | Kiki         | Wild born    | Sumatran orangutan      | H     |
|                                 |             | SRX243479  |              |              |                         |       |
|                                 |             | SRX243478  | Elsi         | Wild born    | Sumatran orangutan      | H     |
| SRX243477                       |             |            |              |              |                         |       |
| <i>Nomascus leucogenys</i>      | PRJNA232723 | SRX590192  | NLE-Asteriks | Captive born | female blood            | R     |
|                                 |             | SRX590181  | NLE-Vok      | Captive born | male blood              | R     |
|                                 | PRJNA13975  | SRX119997  | NLEU_NLL-600 | Captive born | male blood              | R     |
|                                 |             | SRX119996  | NLEU_NLL-607 | Captive born | female blood            | R     |
| <i>Hylobates moloch</i>         | PRJNA82883  | SRX120003  | HMOL_HMO 892 | Captive born | female blood            | R     |
|                                 | PRJNA232723 | SRX590190  | HMO-Madena   |              | male blood              | R     |
|                                 |             | SRX590198  | HLE-Drew     | captive born | female blood            | R     |
|                                 |             | SRX590196  | HLE-Maung    | captive born | male blood              | R     |

Continues next page



| Species                        | Project     | SRX        | Sample                         | Origin                                                      | Observations                 | H558R              |   |
|--------------------------------|-------------|------------|--------------------------------|-------------------------------------------------------------|------------------------------|--------------------|---|
| <i>Rhinopithecus roxellana</i> | PRJNA283338 | SRX1024236 | RR11                           | Centre of Experimental Primates at Kunming Institute, China | blood adult                  | H                  |   |
|                                |             | SRX1024227 | RR1                            |                                                             | blood adult male             | H                  |   |
|                                |             | SRX1024247 | RR22                           |                                                             | blood adult                  | H                  |   |
|                                |             | SRX1024246 | RR21                           |                                                             | blood adult                  | H                  |   |
|                                |             | SRX1024229 | RR4                            |                                                             | blood adult                  | H                  |   |
|                                |             | SRX1024237 | RR12                           |                                                             | blood adult                  | H                  |   |
| <i>Colobus angolensis</i>      | PRJNA251421 | SRX792356  | CANG.PA-37697                  | San Diego Zoo                                               | adult female heart           | H                  |   |
|                                |             | SRX792360  |                                |                                                             |                              |                    |   |
|                                | SRP005434   | SRX039392  | Colobus monkey PR00099         |                                                             | Coriell DNA Male             | H                  |   |
| <i>Papio anubis</i>            | PRJNA433868 | SRX5516791 | 1X1125                         |                                                             | female                       | H                  |   |
|                                |             | SRX6809758 | 9045                           |                                                             | blood                        | H                  |   |
|                                |             | SRX6809725 | 13951                          |                                                             | blood                        | H                  |   |
|                                |             | SRX6809762 | 1X3321                         |                                                             | blood                        | H                  |   |
|                                |             | SRX6809746 | 1X4080                         |                                                             | blood                        | H                  |   |
|                                |             | SRX5516802 | 9841                           |                                                             | female                       | H                  |   |
|                                |             | SRX5516820 | 12242                          |                                                             | female                       | H                  |   |
|                                |             | SRX5516816 | 26988                          |                                                             | female                       | H                  |   |
| <i>Macaca mullata</i>          | PRJNA251548 | SRX8532765 | 38158                          | Wisconsin National Primate Research Center                  | female blood                 | H                  |   |
|                                |             | SRX8532767 | 38160                          |                                                             | female blood                 | H                  |   |
|                                |             | SRX8532764 | 38157                          |                                                             | female blood                 | H                  |   |
|                                |             | SRX8532766 | 38159                          |                                                             | female blood                 | H                  |   |
|                                | PRJNA382404 | SRX7133280 | m05200                         |                                                             | female blood<br>Indian breed | H                  |   |
|                                | PRJNA382404 | SRX7133282 | m05014                         |                                                             | male blood<br>Indian Breed   | H                  |   |
| <i>Chlorocebus sabaeus</i>     | PRJNA368714 | SRX3306491 | VRV1723                        |                                                             | male blood                   | H                  |   |
|                                |             | SRX3306490 | VRV1719                        |                                                             | male blood                   | H                  |   |
|                                |             | SRX3306492 | VRV1722                        |                                                             | male blood                   | H                  |   |
|                                | PRJNA240242 | SRX497144  | VCAC-2000043-VRV0491           |                                                             |                              | male acd-blood     | H |
|                                |             | SRX497168  | VCAC-2000080-VRV0501           |                                                             |                              | female acd-blood   | H |
|                                |             | SRX497142  | VCAC-1998073-VRV0270           |                                                             |                              | male acd-Blood     | H |
|                                |             | SRX658822  | VCAC-2005088-VRV1273           |                                                             |                              | female whole blood | H |
|                                | PRJNA168527 | SRX3266835 | CASA-091214_gDN A_B5616_Tu be1 |                                                             |                              | blood              | H |

Continues next page

| <b>Species</b>                      | <b>Project</b> | <b>SRX</b> | <b>Sample</b>         | <b>origin</b>                                        | <b>observations</b>              | <b>H558R</b> |
|-------------------------------------|----------------|------------|-----------------------|------------------------------------------------------|----------------------------------|--------------|
| <i>Pithecia pithecia</i>            | PRJNA399413    | SRX8010141 | PitPit_1_DIS<br>COVAR | San Diego Zoo Institute for<br>Conservation Research |                                  | H            |
| <i>Callithrix jacchus</i>           | PRJNA566173    | SRX7047414 | SAMN12783<br>337      | Wisconsin Primate Research<br>Center                 | female skin cell<br>line cj17000 | H            |
|                                     |                | SRX7001670 |                       |                                                      |                                  |              |
|                                     | PRJNA401030    | SRX8843881 | CJ-08-46              |                                                      | female<br>fibroblast             | H            |
| <i>Cebus capucinus<br/>imitator</i> | PRJNA298580    | SRX1560048 | 569822                |                                                      |                                  | H            |
|                                     |                | SRX1560050 |                       |                                                      |                                  |              |
|                                     | PRJNA298580    | SRX1435930 | 569789                |                                                      |                                  | H            |

**Table S4.** rs1805124 minor allele frequency distribution in all populations analysed collected from the 1KGP Phase 3. ACB- African Caribbeans in Barbados; ASW- Americans of African Ancestry in SW USA; ESN-Esan in Nigeria; GWD-Gambian in Western Divisions in the Gambia; LWK-Luhya in Webuye, Kenya; MSL-Mende in Sierra Leone; YRI-Yoruba in Ibadan, Nigeria; CLM-Colombians from Medellin, Colombia; MXL-Mexican Ancestry from Los Angeles USA; PEL-Peruvians from Lima, Peru; PUR-Puerto Ricans from Puerto Rico; CDX-Chinese Dai in Xishuangbanna, China; CHB-Han Chinese in Beijing, China; CHS-Southern Han Chinese; JPT-Japanese in Tokyo, Japan; KHV-Kinh in Ho Chi Minh City, Vietnam; CEU- Utah Residents (CEPH) with Northern and Western European Ancestry; FIN-Finnish in Finland; GBR-British in England and Scotland; IBS-Iberian Population in Spain; TSI- Tuscany in Italia; BEB-Bengali from Bangladesh; GIH-Gujarati Indian from Houston, Texas; ITU-Indian Telugu from the UK; PJL-Punjabi from Lahore, Pakistan; STU-Sri Lankan Tamil from the UK.

| POPULATION<br>RS1805124 | ALLELIC FREQUENCIES |              | GENOTYPIC FREQUENCIES |              |              |
|-------------------------|---------------------|--------------|-----------------------|--------------|--------------|
|                         | T (His)             | C (Arg)      | TT                    | CC           | CT           |
| <b>AFRICAN</b>          | <b>0.691</b>        | <b>0.309</b> | <b>0.487</b>          | <b>0.106</b> | <b>0.407</b> |
| ACB                     | 0.719               | 0.281        | 0.542                 | 0.104        | 0.354        |
| ASW                     | 0.738               | 0.262        | 0.557                 | 0.082        | 0.361        |
| ESN                     | 0.783               | 0.217        | 0.596                 | 0.030        | 0.374        |
| GWD                     | 0.628               | 0.372        | 0.442                 | 0.186        | 0.372        |
| LWK                     | 0.697               | 0.303        | 0.485                 | 0.091        | 0.424        |
| MSL                     | 0.618               | 0.382        | 0.388                 | 0.153        | 0.459        |
| YRI                     | 0.671               | 0.329        | 0.426                 | 0.083        | 0.491        |
| <b>AMERICAN</b>         | <b>0.772</b>        | <b>0.228</b> | <b>0.597</b>          | <b>0.052</b> | <b>0.352</b> |
| CLM                     | 0.761               | 0.239        | 0.543                 | 0.021        | 0.436        |
| MXL                     | 0.836               | 0.164        | 0.703                 | 0.031        | 0.266        |
| PEL                     | 0.776               | 0.224        | 0.624                 | 0.071        | 0.306        |
| PUR                     | 0.740               | 0.260        | 0.558                 | 0.077        | 0.365        |
| <b>EAST ASIAN</b>       | <b>0.899</b>        | <b>0.101</b> | <b>0.804</b>          | <b>0.006</b> | <b>0.190</b> |
| CDX                     | 0.930               | 0.070        | 0.871                 | 0.011        | 0.118        |
| CHB                     | 0.874               | 0.126        | 0.748                 | -            | 0.252        |
| CHS                     | 0.905               | 0.095        | 0.819                 | 0.010        | 0.171        |
| JPT                     | 0.865               | 0.135        | 0.740                 | 0.010        | 0.250        |
| KHV                     | 0.924               | 0.076        | 0.848                 | -            | 0.152        |
| <b>EUROPEAN</b>         | <b>0.783</b>        | <b>0.217</b> | <b>0.610</b>          | <b>0.044</b> | <b>0.346</b> |
| CEU                     | 0.818               | 0.182        | 0.657                 | 0.020        | 0.323        |
| FIN                     | 0.823               | 0.177        | 0.667                 | 0.020        | 0.313        |
| GBR                     | 0.775               | 0.225        | 0.593                 | 0.044        | 0.363        |
| IBS                     | 0.738               | 0.262        | 0.561                 | <b>0.084</b> | 0.355        |
| TSI                     | 0.766               | 0.234        | 0.579                 | 0.047        | 0.374        |
| <b>SOUTH ASIAN</b>      | <b>0.727</b>        | <b>0.273</b> | <b>0.532</b>          | <b>0.078</b> | <b>0.391</b> |
| BEB                     | 0.721               | 0.279        | 0.500                 | 0.058        | 0.442        |
| GIH                     | 0.796               | 0.204        | 0.612                 | 0.019        | 0.369        |
| ITU                     | 0.706               | 0.294        | 0.529                 | 0.118        | 0.353        |
| PJL                     | 0.740               | 0.260        | 0.531                 | 0.052        | 0.417        |
| STU                     | 0.672               | 0.328        | 0.480                 | 0.137        | 0.382        |

**Table S5.** Bayesian One Sample T-Test, using the Two-sided alternative hypothesis that the superpopulation mean is not equal to the test value (H0). a- Average frequency of all populations from 1KGP, b-Average frequency of all populations within the 95% confidence interval, N- Number of populations included in the test, SD standard deviation, SE standard error of the mean, BF01 and BF10 Bayes factors of likelihood of H0 and H1, respectively. ESN-Esan in Nigeria, GWD- Gambian in Western Divisions in the Gambia, MSL-Mende in Sierra Leone, CDX-Chinese Dai in Xishuangbanna and IBS in Spain.

| Population  | N | Mean<br>(H0) | SD    | SE    | BF <sub>01</sub> | BF <sub>10</sub> | error %  | 95% Confidence Interval |       | Outlier sub<br>populations |
|-------------|---|--------------|-------|-------|------------------|------------------|----------|-------------------------|-------|----------------------------|
|             |   |              |       |       |                  |                  |          | Lower                   | Upper |                            |
| African     | 7 | 0.307        | 0.059 | 0.022 | 2.831            | 0.353            | 6.191e-6 | 0.252                   | 0.361 | ESN, GWD, MSL              |
| American    | 4 | 0.222        | 0.041 | 0.021 | 2.338            | 0.428            | 2.607e-7 | 0.156                   | 0.287 |                            |
| East Asian  | 5 | 0.100        | 0.029 | 0.013 | 2.515            | 0.398            | 6.831e-6 | 0.064                   | 0.137 |                            |
| European    | 5 | 0.216        | 0.036 | 0.016 | 2.516            | 0.397            | 7.009e-6 | 0.171                   | 0.261 | IBS                        |
| South Asian | 5 | 0.273        | 0.046 | 0.021 | 2.516            | 0.397            | 7.009e-6 | 0.216                   | 0.330 |                            |

**Table S6.** Haplotype analysis of the 1KGP data. Haplotypes were obtained through combination of variants (rs2051211, rs3922844, rs7374004, rs7374540, rs6599222, rs11710077) found to be in LD with rs1805124. Frequency and count values refer to the sum off all populations, individual population counts are shown in the respective population columns. Bold haplotypes carry the rs1805124-C allele (Arg558).

|     | rs2051211 | rs3922844 | rs7374004 | rs7374540 | rs1805124 | rs6599222 | rs11710077 | N° of risk alleles | Count      | Frequency     | African   | American  | South Asian | European  | East Asian |
|-----|-----------|-----------|-----------|-----------|-----------|-----------|------------|--------------------|------------|---------------|-----------|-----------|-------------|-----------|------------|
| H1  | A         | C         | T         | A         | T         | T         | A          | 1                  | 1132       | 0.226         | 45        | 187       | 281         | 304       | 315        |
| H2  | A         | C         | A         | C         | T         | T         | A          | 1                  | 672        | 0.1342        | 117       | 87        | 88          | 82        | 298        |
| H3  | A         | T         | A         | C         | T         | T         | A          | 1                  | 466        | 0.0931        | 383       | 42        | 28          | 6         | 7          |
| H4  | A         | C         | A         | C         | T         | C         | A          | 2                  | 461        | 0.0921        | 161       | 87        | 89          | 112       | 12         |
| H5  | G         | C         | A         | C         | T         | T         | A          | 2                  | 283        | 0.0565        | 7         | 17        | 38          | 49        | 172        |
| H6  | <b>G</b>  | <b>T</b>  | <b>A</b>  | <b>A</b>  | <b>C</b>  | <b>T</b>  | <b>T</b>   | <b>4</b>           | <b>251</b> | <b>0.0501</b> | <b>39</b> | <b>56</b> | <b>64</b>   | <b>81</b> | <b>11</b>  |
| H7  | A         | T         | A         | A         | C         | T         | T          | 3                  | 246        | 0.0491        | 58        | 30        | 80          | 38        | 40         |
| H8  | A         | T         | A         | C         | T         | C         | A          | 2                  | 172        | 0.0343        | 83        | 28        | 11          | 49        | 1          |
| H9  | A         | T         | A         | A         | C         | T         | A          | 2                  | 168        | 0.0335        | 75        | 17        | 16          | 43        | 17         |
| H10 | A         | T         | A         | C         | C         | T         | A          | 1                  | 163        | 0.0325        | 132       | 13        | 12          | 6         |            |
| H11 | G         | C         | T         | A         | T         | T         | A          | 2                  | 137        | 0.0274        | 1         | 20        | 29          | 32        | 55         |
| H12 | A         | C         | T         | A         | T         | T         | T          | 2                  | 120        | 0.024         | 3         | 24        | 31          | 61        | 1          |
| H13 | G         | T         | A         | C         | T         | T         | A          | 2                  | 104        | 0.0208        | 63        | 10        | 10          | 4         | 17         |
| H14 | G         | T         | A         | A         | C         | T         | A          | 3                  | 101        | 0.0202        | 12        | 22        | 23          | 17        | 27         |
| H15 | A         | C         | A         | C         | C         | T         | A          | 1                  | 95         | 0.019         | 39        | 9         | 40          | 3         | 4          |
| H16 | G         | C         | A         | C         | T         | C         | A          | 3                  | 81         | 0.0162        | 41        | 6         | 17          | 15        | 2          |
| H17 | <b>A</b>  | <b>C</b>  | <b>T</b>  | <b>C</b>  | <b>T</b>  | <b>T</b>  | <b>A</b>   | <b>0</b>           | <b>68</b>  | <b>0.0136</b> | <b>2</b>  | <b>3</b>  | <b>41</b>   | <b>20</b> | <b>2</b>   |
| H18 | G         | T         | A         | C         | C         | T         | A          | 2                  | 57         | 0.0114        | 11        | 7         | 20          | 19        |            |
| H19 | G         | T         | A         | C         | T         | C         | A          | 3                  | 26         | 0.0052        | 3         | 7         | 8           | 8         |            |
| H20 | <b>A</b>  | <b>C</b>  | <b>T</b>  | <b>C</b>  | <b>C</b>  | <b>T</b>  | <b>A</b>   | <b>0</b>           | <b>20</b>  | <b>0.004</b>  | <b>16</b> | <b>2</b>  | <b>1</b>    | <b>1</b>  |            |
| H21 | A         | C         | A         | C         | T         | C         | T          | 3                  | 19         | 0.0038        |           | 3         | 6           | 9         | 1          |
| H22 | G         | C         | T         | C         | T         | T         | A          | 1                  | 15         | 0.003         |           |           | 2           | 4         | 9          |
| H23 | A         | C         | A         | C         | T         | T         | T          | 2                  | 14         | 0.0028        | 1         | 1         | 11          |           | 1          |
| H24 | A         | C         | T         | A         | C         | T         | A          | 1                  | 12         | 0.0024        | 6         |           | 2           | 1         | 3          |
| H25 | A         | T         | A         | C         | C         | T         | T          | 2                  | 11         | 0.0022        | 11        |           |             |           |            |
| H26 | G         | C         | A         | C         | C         | T         | A          | 2                  | 11         | 0.0022        | 1         | 1         | 3           | 6         |            |
| H27 | G         | T         | A         | A         | T         | T         | T          | 4                  | 11         | 0.0022        |           | 4         | 2           | 5         |            |
| H28 | G         | C         | T         | A         | T         | T         | T          | 3                  | 10         | 0.002         |           |           | 6           | 4         |            |
| H29 | A         | C         | A         | A         | T         | T         | A          | 2                  | 9          | 0.0018        |           |           | 1           | 3         | 5          |
| H30 | A         | C         | T         | A         | C         | T         | T          | 2                  | 7          | 0.0014        |           |           | 5           | 2         |            |
| H31 | G         | C         | A         | C         | T         | T         | T          | 3                  | 7          | 0.0014        |           | 1         | 2           |           | 4          |
| H32 | A         | T         | A         | A         | T         | T         | A          | 2                  | 6          | 0.0012        |           | 1         | 1           | 2         | 2          |
| H33 | A         | T         | A         | C         | T         | C         | T          | 3                  | 6          | 0.0012        | 1         | 1         |             | 3         | 1          |
| H34 | G         | T         | A         | A         | T         | T         | A          | 3                  | 6          | 0.0012        |           | 2         | 1           | 3         |            |
| H35 | G         | T         | A         | C         | T         | T         | T          | 3                  | 6          | 0.0012        |           | 1         | 5           |           |            |
| H36 | A         | C         | T         | A         | T         | C         | A          | 2                  | 4          | 0.0008        |           | 1         | 1           | 2         |            |
| H37 | A         | T         | A         | A         | T         | T         | T          | 3                  | 4          | 0.0008        |           | 1         |             | 3         |            |
| H38 | G         | T         | T         | A         | T         | T         | A          | 2                  | 4          | 0.0008        |           | 1         | 1           | 2         |            |
| H39 | A         | C         | A         | A         | C         | T         | T          | 3                  | 3          | 0.0006        | 2         | 1         |             |           |            |
| H40 | A         | T         | A         | C         | T         | T         | T          | 2                  | 3          | 0.0006        | 1         |           |             | 2         |            |
| H41 | A         | T         | T         | A         | T         | T         | A          | 1                  | 3          | 0.0006        |           | 1         |             | 2         |            |
| H42 | G         | C         | T         | C         | C         | T         | A          | 1                  | 3          | 0.0006        | 3         |           |             |           |            |

|                                        |               |   |   |        |           |           |           |           |           |
|----------------------------------------|---------------|---|---|--------|-----------|-----------|-----------|-----------|-----------|
| <b>H43</b>                             | A_T_A_C_C_C_A | 2 | 2 | 0.0004 | 2         |           |           |           |           |
| <b>H44</b>                             | G_C_A_C_T_C_T | 4 | 2 | 0.0004 |           |           | 1         | 1         |           |
| <b>H45</b>                             | G_T_A_C_C_C_A | 3 | 2 | 0.0004 | 2         |           |           |           |           |
| <b>H46</b>                             | A_C_A_A_C_T_A | 2 | 1 | 0.0002 |           |           |           | 1         |           |
| <b>H47</b>                             | A_C_T_C_T_C_A | 1 | 1 | 0.0002 |           |           |           | 1         |           |
| <b>H48</b>                             | A_T_T_A_T_T_T | 2 | 1 | 0.0002 | 1         |           |           |           |           |
| <b>H49</b>                             | G_C_A_A_C_T_T | 4 | 1 | 0.0002 |           |           | 1         |           |           |
| <b>H50</b>                             | G_C_A_A_T_T_A | 3 | 1 | 0.0002 |           |           |           |           | 1         |
| <b>N° of haplotypes per population</b> |               |   |   |        | <b>31</b> | <b>34</b> | <b>37</b> | <b>39</b> | <b>25</b> |
